# Supplementary material
Source: PubMed Central journal article supplement (PMC5703817)
Supplement: JCM.01069-17_zjm012175726s1.pdf [file JCM.01069-17_zjm012175726s1.pdf]

**Supplementary Material**

**Table S1: Resistance Gene Annotation in KPNIH1 assemblies**

| Plasmid     | Accession Number | Assembly:                       |                           |                              |                                     |
|-------------|------------------|---------------------------------|---------------------------|------------------------------|-------------------------------------|
|             |                  | Reference Sequence (% Identity) | Draft MinION (% Identity) | Polished MinION (% Identity) | Polished MinION+ MiSeq (% Identity) |
| pKPN-498    | NZ_CP008829      | <i>aadA2</i> (100)              | + (99.6)                  | + (99.1)                     | + (99.4)                            |
|             |                  | <i>aph(3')-Ia</i> (100)         | + (99.4)                  | + (99.5)                     | + (100)                             |
|             |                  | <i>mph(A)</i> (100)             | + (99.2)                  | + (98.9)                     | + (99.6)                            |
|             |                  | <i>catA1</i> (99.9)             | + (99.4)                  | + (98.5)                     | + (99.9)                            |
|             |                  | <i>sul1</i> (100)               | + (99.8)                  | + (99.7)                     | + (100)                             |
|             |                  | <i>dfrA12</i> (100)             | + (99.4)                  | + (99.4)                     | + (100)                             |
| pKpQIL-6e6  | NZ_CP008830      | <i>blaKPC-3</i> (100)           | + (99.7)                  | + (99.3)                     | + (99.9)                            |
|             |                  | <i>blaOXA-9</i> (99.9)          | + (99.3)                  | + (99.1)                     | + (99.5)                            |
|             |                  | <i>blaTEM-1A</i> (99.9)         | + (99.5)                  | + (99.5)                     | + (99.7)                            |
| pAAC154-a50 | NZ_CP008828      | <i>aac(6')-Ib</i> (100)         | + (99.7)                  | + (99.7)                     | + (99.8)                            |
|             |                  | <i>aac(6')Ib-cr</i> (99.4)      | + (99.0)                  | + (99.0)                     | + (99.2)                            |

Draft and polished MinION assemblies generated from MinION reads only with Canu, and Canu and Racon, respectively. Polished MinION + MiSeq assembly is a MinION assembly polished with MiSeq reads using Pilon.

**Table S2: Resistance Gene Annotation in ECESBL-1 Assemblies**

| Contig Name | Resistance Gene             | Draft MinION Assembly (% Identity) | Finished MinION + MiSeq Assembly (% Identity) | SPAdes MiSeq Assembly (% Identity) |
|-------------|-----------------------------|------------------------------------|-----------------------------------------------|------------------------------------|
| Contig 8    | <i>strA</i>                 | + (99.3)                           | + (100)                                       | + (100)                            |
|             | <i>strB</i>                 | + (99.3)                           | + (100)                                       | + (100)                            |
|             | <i>aadA5</i>                | + (99.2)                           | + (100)                                       | + (100)                            |
|             | <i>aac(3)-IId</i>           | + (99.3)                           | + (99.9)                                      | + (99.9)                           |
|             | <i>bla<sub>TEM-1B</sub></i> | + (99.7)                           | + (100)                                       | + (100)                            |
|             | <i>mph(A)</i>               | + (98.3)                           | + (100)                                       | + (100)                            |
|             | <i>erm(B)</i>               | + (99.7)                           | + (99.9)                                      | -                                  |
|             | <i>sul1</i>                 | + (99.7)                           | + (100)                                       | + (100)                            |
|             | <i>sul2</i>                 | + (99.3)                           | + (100)                                       | + (100)                            |
|             | <i>tet(B)</i>               | + (99.6)                           | + (100)                                       | + (100)                            |
|             | <i>dfrA17</i>               | -                                  | + (100)                                       | + (100)                            |
| Contig 91   | <i>bla<sub>CMY-42</sub></i> | + (99.0)                           | + (100)                                       | + (100)                            |

Draft MinION assembly was generated from MinION reads using canu. Finished assemblies were generated from MinION reads and polished with MiSeq reads. SPAdes assemblies were generated from whole-genome shotgun MiSeq reads only.

**Table S3: Resistance Gene Annotation in KPESBL-1 Assemblies**

| Contig Name | Resistance Gene          | Draft MinION Assembly (% Identity) | Finished MinION + MiSeq Assembly (% Identity) | SPAdes MiSeq Assembly (% Identity) |
|-------------|--------------------------|------------------------------------|-----------------------------------------------|------------------------------------|
| Contig 8    | <i>bla<sub>SHV</sub></i> | + (99.0)                           | + (100)                                       | + (100)                            |
| Contig 14   | <i>aadA1</i>             | aadA24 (92.8)                      | + (100)                                       | + (100)                            |
|             | <i>aadA2</i>             | + (99.1)                           | + (100)                                       | + (100)                            |
|             | <i>aac(3)-IVa</i>        | + (98.4)                           | + (99.9)                                      | + (99.9)                           |
|             | <i>aph(4)-Ia</i>         | + (99.8)                           | + (100)                                       | + (100)                            |
|             | <i>aac(6')-1b</i>        | + (99.3)                           | + (100)                                       | + (100)                            |
|             | <i>aac(6')-1b</i>        | + (98.8)                           | + (99.0)                                      | -                                  |
|             | <i>aac(6')1b-cr</i>      | + (98.8)                           | + (99.4)                                      | + (99.4)                           |
|             | <i>aac(6')1b-cr</i>      | + (98.2)                           | + (98.3)                                      | -                                  |
|             | <i>cmlA1</i>             | + (99.1)                           | + (99.9)                                      | + (99.9)                           |
|             | <i>sul3</i>              | + (98.5)                           | + (100)                                       | + (100)                            |
| Contig 17   | <i>aadA2</i>             | + (98.5)                           | + (100)                                       | -                                  |
|             | <i>mph(A)</i>            | + (99.5)                           | + (100)                                       | + (100)                            |
|             | <i>catA1</i>             | + (98.2)                           | + (99.9)                                      | + (99.9)                           |
|             | <i>sul1</i>              | + (98.4)                           | + (100)                                       | + (100)                            |
|             | <i>dfrA12</i>            | + (98.8)                           | + (100)                                       | -                                  |

Draft MinION assembly was generated from MinION reads using Canu. Finished assemblies were generated from MinION reads and polished with MiSeq reads. SPAdes assemblies were generated from whole-genome shotgun MiSeq reads only.

**Table S4. Individual plasmid coverage by MinION assemblies from reads subset.**

| Isolate  | Plasmid     | Length (bp) | Length |        |        |        |        |
|----------|-------------|-------------|--------|--------|--------|--------|--------|
|          |             |             | 200    | 500    | 1000   | 2000   | 5000   |
| KPNIH1   | pKPN-498    | 243824      | 0.0%   | 14.1%  | 87.6%  | 99.9%  | 99.9%  |
| KPNIH1   | pKpQIL-6e6  | 113639      | 63.8%  | 99.1%  | 100.0% | 100.0% | 100.0% |
| KPNIH1   | pAAC154-a50 | 15096       | 0.0%   | 0.0%   | 100.0% | 100.0% | 100.0% |
| ECESBL-1 | ctg_8       | 110096      | 90.3%  | 100.0% | 100.0% | 100.0% | 100.0% |
| ECESBL-1 | ctg_91      | 48584       | 24.9%  | 97.7%  | 100.0% | 100.0% | 100.0% |
| ECESBL-1 | ctg_94      | 6648        | 0.0%   | 0.0%   | 0.0%   | 0.0%   | 100.0% |
| ECESBL-1 | ctg_41      | 3174        | 0.0%   | 0.0%   | 0.0%   | 100.0% | 0.0%   |
| ECESBL-1 | ctg_83      | 2101        | 0.0%   | 0.0%   | 0.0%   | 66.2%  | 0.0%   |
| KPESBL-1 | ctg_17      | 207553      | 0.0%   | 0.0%   | 0.0%   | 0.2%   | 100.0% |
| KPESBL-1 | ctg_14      | 47948       | 100.0% | 100.0% | 100.0% | 100.0% | 100.0% |
| KPESBL-1 | ctg_8       | 43380       | 100.0% | 100.0% | 100.0% | 100.0% | 100.0% |

Figure S1. Heatmap representation of plasmid coverage.

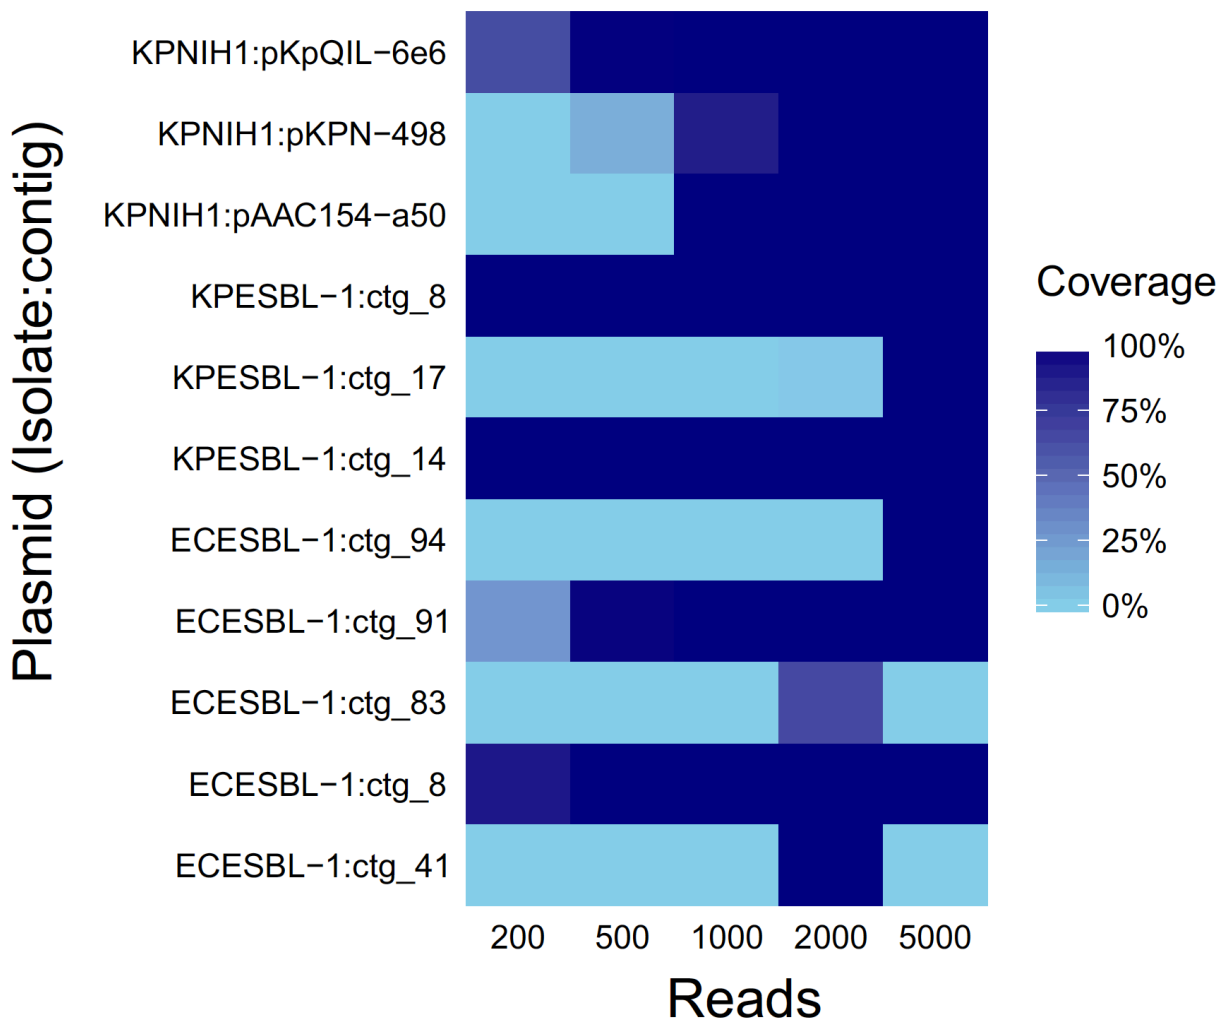

Figure S1: Proportion of reference covered by draft assembly is represented for all plasmids for random subsets of 200, 500, 1000, 2000, and 5000 reads.
